# Supplementary material for: First case of mpox with monkeypox virus clade Ib outside Africa in a returning traveller, Sweden, August 2024: public health measures
Source: PubMed Central journal article supplement (PMC11605805; doi:10.2807/1560-7917.es.2024.29.48.2400740), 2024-11-28
Supplement: 24-00740_SONDEN_Supplementary_table.pdf [file 24-00740_SONDEN_Supplementary_table.pdf]

We gratefully acknowledge the following Authors from the Originating laboratories responsible for obtaining the specimens, as well as the Submitting laboratories where the genome data were generated and shared via GISAID, on which this research is based.

All Submitters of data may be contacted directly via [www.gisaid.org](http://www.gisaid.org)

Authors are sorted alphabetically.

| Accession ID     | Originating Laboratory                                                              | Submitting Laboratory                                                                      | Authors                                                                                                                                                                                                   |
|------------------|-------------------------------------------------------------------------------------|--------------------------------------------------------------------------------------------|-----------------------------------------------------------------------------------------------------------------------------------------------------------------------------------------------------------|
| EPI_ISL_19302262 | National Public Health Laboratory - NVRL                                            | Kenya Medical Research Institute (KEMRI) / Walter Reed Army Institute of Research - Africa | Gathii Kimita, Joseph K. Kaingu, George O. Awinda, Allan P. Lemtudo, Esther A. Omuseni, Josphat N. Nyataya, Beth K. Mutai, John N. Waitumbi                                                               |
| EPI_ISL_19345034 | Arbovirology/Viral Haemorrhagic Fever Lab, Kenya Medical Research Institute (KEMRI) | Arbovirology/Viral Haemorrhagic Fever Lab, Kenya Medical Research Institute (KEMRI)        | Langat,S., Nyunja,A., Pilarowski,G., Okunga,E., Ofula,V., Oluniyi,P., Koskei,E., Koka,H., Owaka,S., Chepkorir,E., Lutomiah,J., Langat,D., Khamadi,S. and Limbaso,K.                                       |
| EPI_ISL_19348512 | The Public Health Agency of Sweden                                                  | The Public Health Agency of Sweden                                                         | Oskar Karlsson Lindsjö, Maria Lind Karlberg, Klara Sondén                                                                                                                                                 |
| EPI_ISL_19350788 | Hospital in Bangkok                                                                 | Department of Medical Sciences, National Institute of Health                               | Pilailuk Okada; Siripaporn Phuygun; Nuttida Thongpramul, Titichaya Mebuathong, Pakorn Piromtong, Thanutsapa Thanadachakul, Thitipong Yingyong, Archawin Rojanawiwat, Ballang Uppapong, Yongyos Thammavuth |
